# Supplementary material
Source: PubMed Central journal article supplement (PMC5444120)
Supplement: AAC.02374-16_zac006176231s1.pdf [file AAC.02374-16_zac006176231s1.pdf]

**Supplementary data belonging to manuscript:**

**Molecular epidemiology in relation to azithromycin resistance in *Neisseria gonorrhoeae* isolates from Amsterdam, the Netherlands, between 2008 and 2015 – a case-control study**

Carolien M Wind,<sup>a,b</sup> Sylvia M Bruisten,<sup>c</sup> Maarten F Schim van der Loeff,<sup>d,e</sup> Mirjam Dierdorp,<sup>c</sup> Henry JC de Vries,<sup>a,b,e</sup> Alje P van Dam<sup>c,f,#</sup>

<sup>a</sup> STI Outpatient Clinic, Department of Infectious Diseases, Public Health Service Amsterdam, Amsterdam, the Netherlands

<sup>b</sup> Department of Dermatology, Academic Medical Center, University of Amsterdam, Amsterdam, the Netherlands

<sup>c</sup> Public Health Laboratory, Public Health Service Amsterdam, Amsterdam, the Netherlands

<sup>d</sup> Department of Infectious Diseases, Public Health Service Amsterdam, Amsterdam, the Netherlands

<sup>e</sup> Center for Infection and Immunity Amsterdam, Academic Medical Center, University of Amsterdam, Amsterdam, the Netherlands

<sup>f</sup> Department of Medical Microbiology, OLVG General Hospital, Amsterdam, the Netherlands

Supplementary Figures: 1

Supplementary Tables: 1

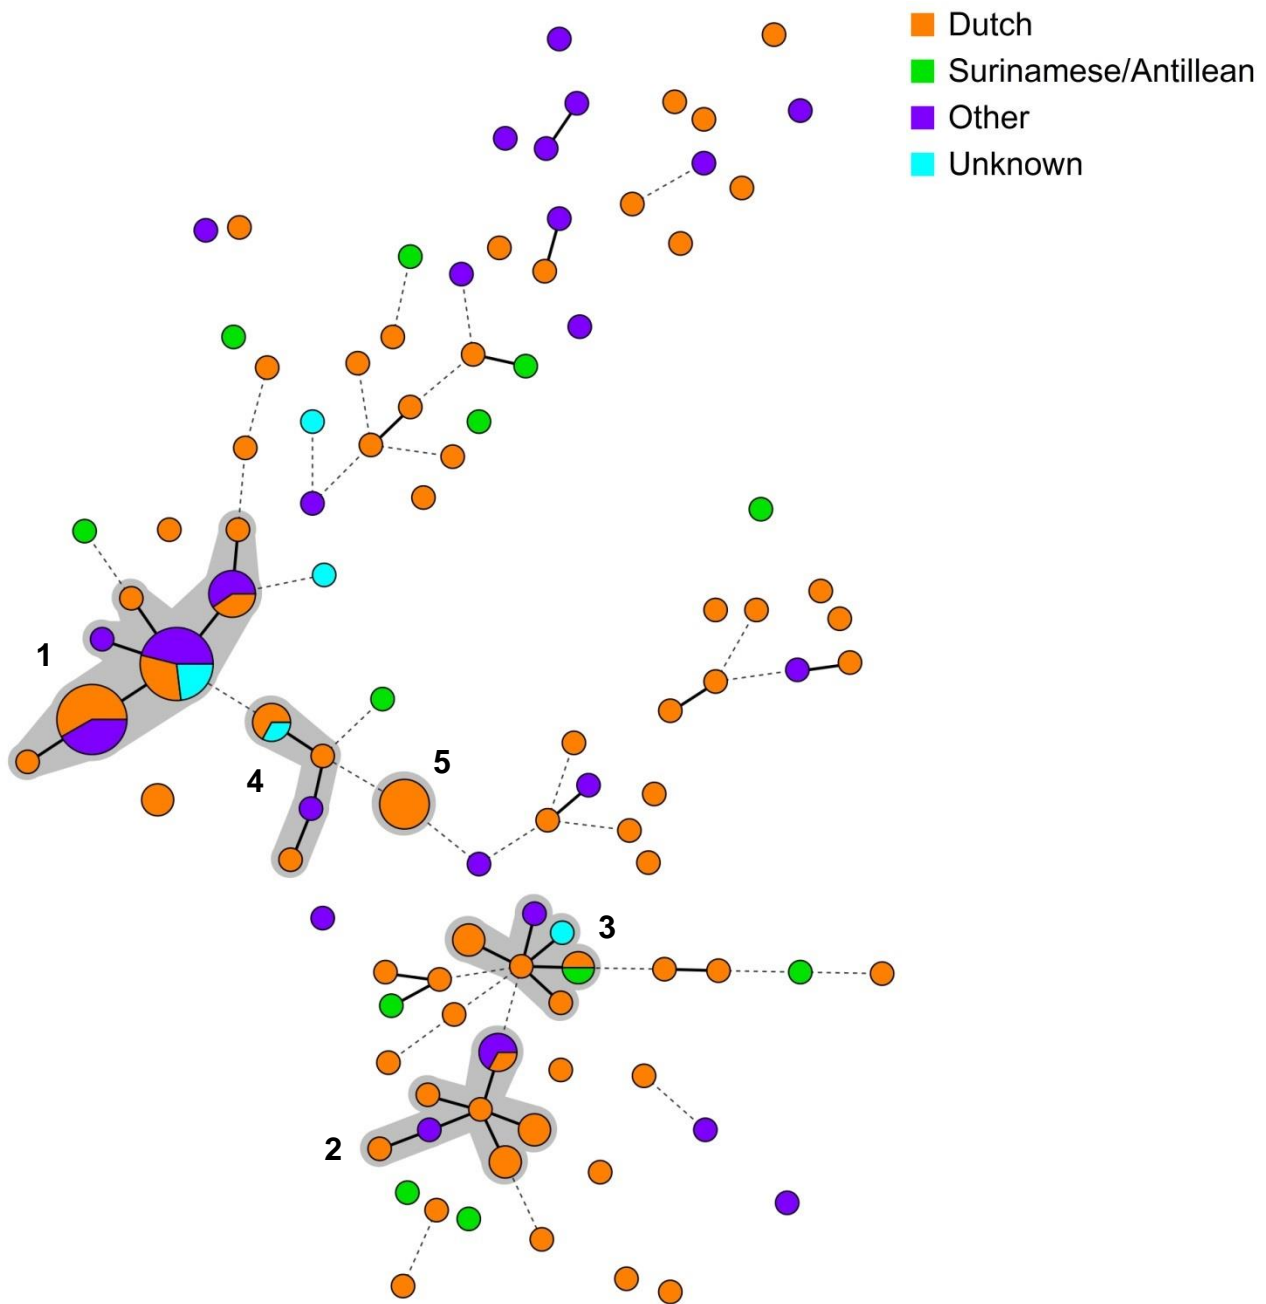

**SUPPLEMENTARY FIG 1** Minimum spanning tree of 143 *N. gonorrhoeae* isolates based on NG-MLVA, by ethnic origin

Each circle represents a different NG-MLVA type, the size of the circle represents the number of isolates, a solid line represents a difference of one locus, a dashed line represents a difference of two loci. A cluster (grey area) was assigned for NG-MLVA types that differed on one locus and contained at least five isolates. NG-MLVA, *Neisseria gonorrhoeae* multilocus variable-number tandem repeat analysis.

**SUPPLEMENTARY TABLE 1** NG-MAST sequence types of 143 *N. gonorrhoeae* isolates of patients visiting the STI Outpatient Clinic Amsterdam, the Netherlands from January 2008 through September 2015, by susceptibility to azithromycin<sup>a</sup>

| <b>NG-MAST ST</b><br><b>n = 65</b> | <b>Total</b><br><b>n = 143</b> | <b>Resistant</b><br><b>n = 69</b> | <b>Susceptible</b><br><b>n = 74</b> |
|------------------------------------|--------------------------------|-----------------------------------|-------------------------------------|
| 2                                  | 1                              | 0                                 | 1                                   |
| 21                                 | 3                              | 2                                 | 1                                   |
| 51                                 | 2                              | 0                                 | 2                                   |
| 205                                | 1                              | 1                                 | 0                                   |
| 210                                | 1                              | 0                                 | 1                                   |
| 225                                | 1                              | 0                                 | 1                                   |
| 359                                | 8                              | 7                                 | 1                                   |
| 436                                | 1                              | 0                                 | 1                                   |
| 951                                | 1                              | 0                                 | 1                                   |
| 1407                               | 6                              | 1                                 | 5                                   |
| 1419                               | 1                              | 0                                 | 1                                   |
| 1478                               | 1                              | 1                                 | 0                                   |
| 1582                               | 1                              | 0                                 | 1                                   |
| 1666                               | 1                              | 0                                 | 1                                   |
| 2210                               | 2                              | 2                                 | 0                                   |
| 2322                               | 2                              | 2                                 | 0                                   |
| 2400                               | 11                             | 1                                 | 10                                  |
| 2487                               | 1                              | 0                                 | 1                                   |
| 2992                               | 21                             | 18                                | 3                                   |
| 3003                               | 2                              | 0                                 | 2                                   |
| 3128                               | 1                              | 1                                 | 0                                   |
| 3307                               | 2                              | 0                                 | 2                                   |
| 3629                               | 1                              | 0                                 | 1                                   |
| 3806                               | 1                              | 1                                 | 0                                   |
| 3811                               | 1                              | 0                                 | 1                                   |
| 4198                               | 1                              | 1                                 | 0                                   |
| 4234                               | 1                              | 0                                 | 1                                   |
| 4249                               | 1                              | 0                                 | 1                                   |
| 4544                               | 2                              | 0                                 | 2                                   |
| 4589                               | 1                              | 0                                 | 1                                   |
| 4751                               | 1                              | 0                                 | 1                                   |
| 4914                               | 1                              | 0                                 | 1                                   |
| 4995                               | 1                              | 1                                 | 0                                   |
| 5031                               | 1                              | 0                                 | 1                                   |
| 5108                               | 17                             | 17                                | 0                                   |
| 5475                               | 1                              | 0                                 | 1                                   |
| 5520                               | 2                              | 0                                 | 2                                   |
| 5533                               | 3                              | 3                                 | 0                                   |
| 5553                               | 1                              | 1                                 | 0                                   |
| 5793                               | 1                              | 0                                 | 1                                   |
| 6327                               | 3                              | 1                                 | 2                                   |
| 7574                               | 1                              | 0                                 | 1                                   |
| 8919                               | 1                              | 0                                 | 1                                   |
| 10257                              | 1                              | 0                                 | 1                                   |
| 10567                              | 1                              | 1                                 | 0                                   |
| 11072                              | 1                              | 0                                 | 1                                   |

|         |   |   |   |
|---------|---|---|---|
| 11461   | 1 | 0 | 1 |
| 11594   | 1 | 1 | 0 |
| 12212   | 1 | 0 | 1 |
| 13155   | 1 | 0 | 1 |
| 14338   | 1 | 0 | 1 |
| 14339   | 1 | 0 | 1 |
| 14340   | 1 | 0 | 1 |
| 14345   | 1 | 0 | 1 |
| 14346   | 1 | 0 | 1 |
| 14347   | 1 | 0 | 1 |
| 14348   | 1 | 0 | 1 |
| 14349   | 1 | 0 | 1 |
| 14350   | 1 | 0 | 1 |
| 14354   | 1 | 0 | 1 |
| 14361   | 1 | 1 | 0 |
| 14369   | 1 | 1 | 0 |
| 14370   | 1 | 1 | 0 |
| 14375   | 2 | 2 | 0 |
| 14377   | 1 | 0 | 1 |
| 14379   | 1 | 1 | 0 |
| 14391   | 1 | 0 | 1 |
| Missing | 4 | 0 | 4 |

---

<sup>a</sup> Data are presented as number of isolates.

NG-MAST, *N. gonorrhoeae* multiantigen sequence type; ST, sequence type; STI, sexually transmitted infection.
